# Supplementary material
Source: PubMed Central journal article supplement (PMC2749928)

HYPERTENSION Supplement

**DIPEPTIDYL PEPTIDASE IV IN ANGIOTENSIN-CONVERTING ENZYME  
INHIBITOR-ASSOCIATED ANGIOEDEMA**

James Brian Byrd, M.D.,<sup>1</sup> Karine Touzin, B.S.,<sup>2</sup> Saba Sile, M.D.,<sup>1</sup> James V. Gainer,  
M.D.,<sup>1</sup> Chang Yu, Ph.D.,<sup>3</sup> John Nadeau, M.D.,<sup>1</sup> Albert Adam, Ph.D.,<sup>2</sup> and Nancy J.  
Brown, M.D.<sup>1</sup>

From the Department of <sup>1</sup>Medicine, Vanderbilt University Medical School, Nashville,  
TN. From the <sup>2</sup>Faculty of Pharmacy, University of Montreal, Canada. From the  
Department of <sup>3</sup>Biostatistics, Vanderbilt University Medical School, Nashville, TN.  
Veterans Administration Medical Center, Nashville, TN.

## *Methods*

To account for the possibility that endogenous bradykinin was increased in cases compared to controls, we drew blood for measurement of endogenous bradykinin and DPPIV antigen and activity in an additional 6 cases (3 during acute angioedema, 3 during the convalescent phase) and 17 ACE inhibitor-exposed controls.

## *Laboratory analysis*

APP activity was measured using a quenched fluorimetric substrate that mimics the structure of des-Arg<sup>9</sup>-bradykinin and is specific for mAPP.<sup>1</sup> APN activity was determined by incubating sera with ala-p-nitroanilide at 37°C in an adaptation of a method previously described.<sup>2</sup>

The degradation half-lives of bradykinin, des-Arg<sup>9</sup>-bradykinin, and substance P were determined after the addition of known concentrations of exogenous bradykinin or substance P to serum at 37°C.<sup>3</sup> The reaction was stopped after various incubation periods by adding cold anhydrous ethanol at a final concentration of 80% vol/vol. Samples were then incubated at 4°C for 1 h and centrifuged (4°C, 15 min, 3000g). The supernatant was decanted and evaporated to dryness and the residues were stored at 20°C until quantification of peptides. Bradykinin and des-Arg<sup>9</sup>-bradykinin were assayed using specific competitive chemiluminescent enzyme immunoassays, as previously described.<sup>4,5</sup>

For the measurement of substance P, the evaporated residue was reconstituted in 200  $\mu$ L of 5 mM  $\text{KH}_2\text{PO}_4$ , pH 3.0, 25% acetonitrile with 1.0%  $\text{H}_3\text{PO}_4$ . Substance P was separated from its metabolites using an Agilent 1100 Series system (Agilent Technologies Canada, Mississauga, Ca) with a 2-sulfoethyl aspartamide column (PolySULFOETHYL A TM, The Nest Group, Inc, Southboro, MA) and a linear gradient of KCl (0-300 mM) in 5 mM  $\text{KH}_2\text{PO}_4$ , 25% acetonitrile (vol/vol), pH 3.0 for 30 min. The retention time of native substance P was 24.5 min and its detection was obtained at 214 nm. The kinin or substance P (S) hydrolysis rate constant (k) was obtained with a first-order equation  $S = S_0 \times e^{-kt}$ . The degradation half life,  $t_{1/2}$ , was calculated as  $t_{1/2} = \ln(2)/k$ .

Blood for measurement of endogenous bradykinin was drawn into cold anhydrous ethanol at a final concentration of 80% vol/vol. The samples were then incubated for 1 hour at 4°C and centrifuged (2000 x g, 15 min, 4°C) to allow the complete precipitation of the precursors of kinins. The supernatant was saved at -70°C until the time of assay. Collected supernatant was decanted and evaporated to dryness under nitrogen at 37°C and reconstituted in 1.0 ml of distilled water. The pH of the solution was adjusted to 2-3 with 1.0 N HCL and the sample was washed twice with 3.0 ml of diethyl ether to remove lipids. After removal of diethyl ether by aspiration, the sample pH was adjusted to 6-7 with 1.0 N NaOH. Samples were then evaporated to dryness under nitrogen at 37°C and reconstituted in 75ul of assay buffer on the day of assay. Bradykinin concentrations were determined by use of a commercially available enzyme immunoassay (Bachem [Peninsula Laboratories], San Carlos, Calif). The minimal detectable concentration for

this kit is 0.02-0.04 ng/ml, with a range of detection of 0-10 ng/ml. Intra-assay variation is <5%, while inter-assay variation <14%. The antibodies in this kit display 100% cross-reactivity with several bradykinin-related substances, including lys-bradykinin, biotinyl-bradykinin, (Tyr<sup>0</sup>)-bradykinin, des-Arg<sup>1</sup>-bradykinin, and bradykinin-(4-9). The antibodies partially cross-react (40%) with bradykinin-(5-9).

## *Results*

### *Relationship between DPPIV and endogenous bradykinin*

Endogenous bradykinin concentrations were similar to the normal range reported by Nussberger et al.<sup>6</sup> Bradykinin concentrations were not significantly elevated in cases compared to controls (Figure S1). In addition, there was no correlation between bradykinin concentrations and either DPPIV antigen ( $r^2 = 0.06$ ,  $P = 0.26$ ) or activity ( $r^2 = 0.04$ ,  $P = 0.38$ ).

## References

1. Molinaro G, Carmona AK, Juliano MA, Juliano L, Malitskaya E, Yessine MA, Chagnon M, Lepage Y, Simmons WH, Boileau G, Adam A. Human recombinant membrane-bound aminopeptidase P: production of a soluble form and characterization using novel, internally quenched fluorescent substrates. *Biochem J.* 2005; 385:389-397.
2. Lendeckel U, Wex T, Reinhold D, Kahne T, Frank K, Faust J, Neubert K, Ansorge S. Induction of the membrane alanyl aminopeptidase gene and surface expression in human T-cells by mitogenic activation. *Biochem J.* 1996; 319 ( Pt 3):817-821.
3. Cyr M, Lepage Y, Blais C, Jr., Gervais N, Cugno M, Rouleau JL, Adam A. Bradykinin and des-Arg(9)-bradykinin metabolic pathways and kinetics of activation of human plasma. *Am J Physiol Heart Circ Physiol.* 2001; 281:H275-H283.
4. Decarie A, Drapeau G, Closset J, Couture R, Adam A. Development of digoxigenin-labeled peptide: application to chemiluminoenzyme immunoassay of bradykinin in inflamed tissues. *Peptides.* 1994; 15:511-518.
5. Raymond P, Drapeau G, Raut R, Audet R, Marceau F, Ong H, Adam A. Quantification of des-Arg9-bradykinin using a chemiluminescence enzyme immunoassay: application to its kinetic profile during plasma activation. *J Immunol Methods.* 1995; 180:247-257.

6. Nussberger J, Cugno M, Amstutz C, Cicardi M, Pellacani A, Agostoni A. Plasma bradykinin in angio-oedema. *Lancet*. 1998; 351:1693-1697.

Figure legend.

Figure S1. Endogenous bradykinin concentrations in individuals with angiotensin-converting enzyme inhibitor-associated angioedema and angiotensin-converting enzyme inhibitor-exposed controls.

Figure S1.

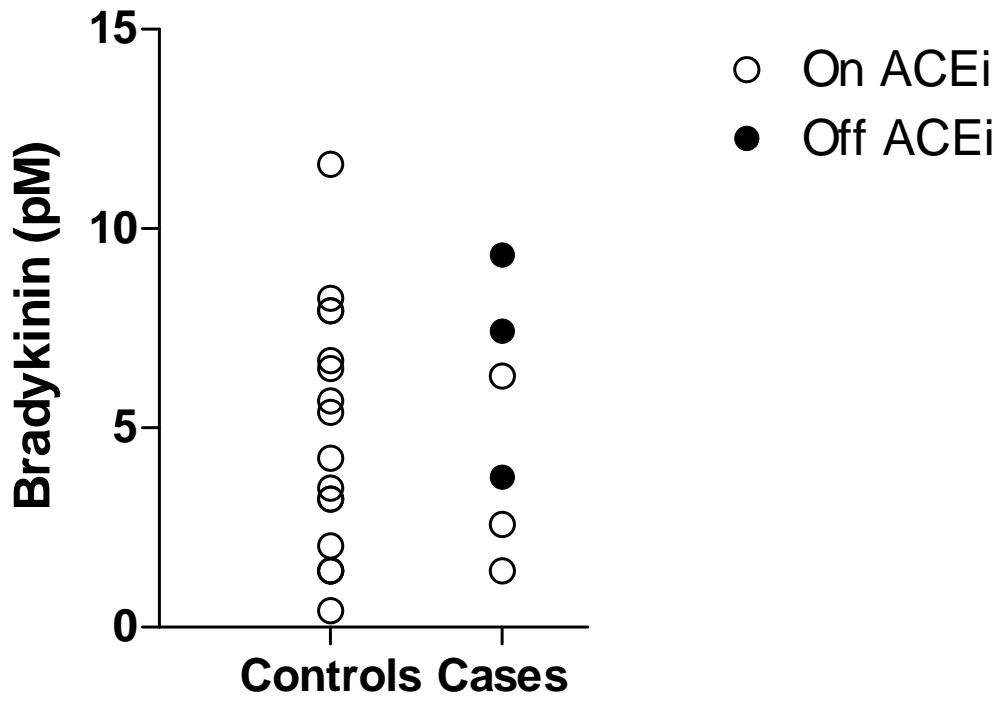

Supplement: NIHMS71673-supplement-supplement.pdf [file NIHMS71673-supplement-supplement.pdf]
